# Supplementary material for: Circ_0036412 affects the proliferation and cell cycle of hepatocellular carcinoma via hedgehog signaling pathway
Source: Springer Nature journal article supplement (doi:10.1186/s12967-022-03305-x), 2022-04-05

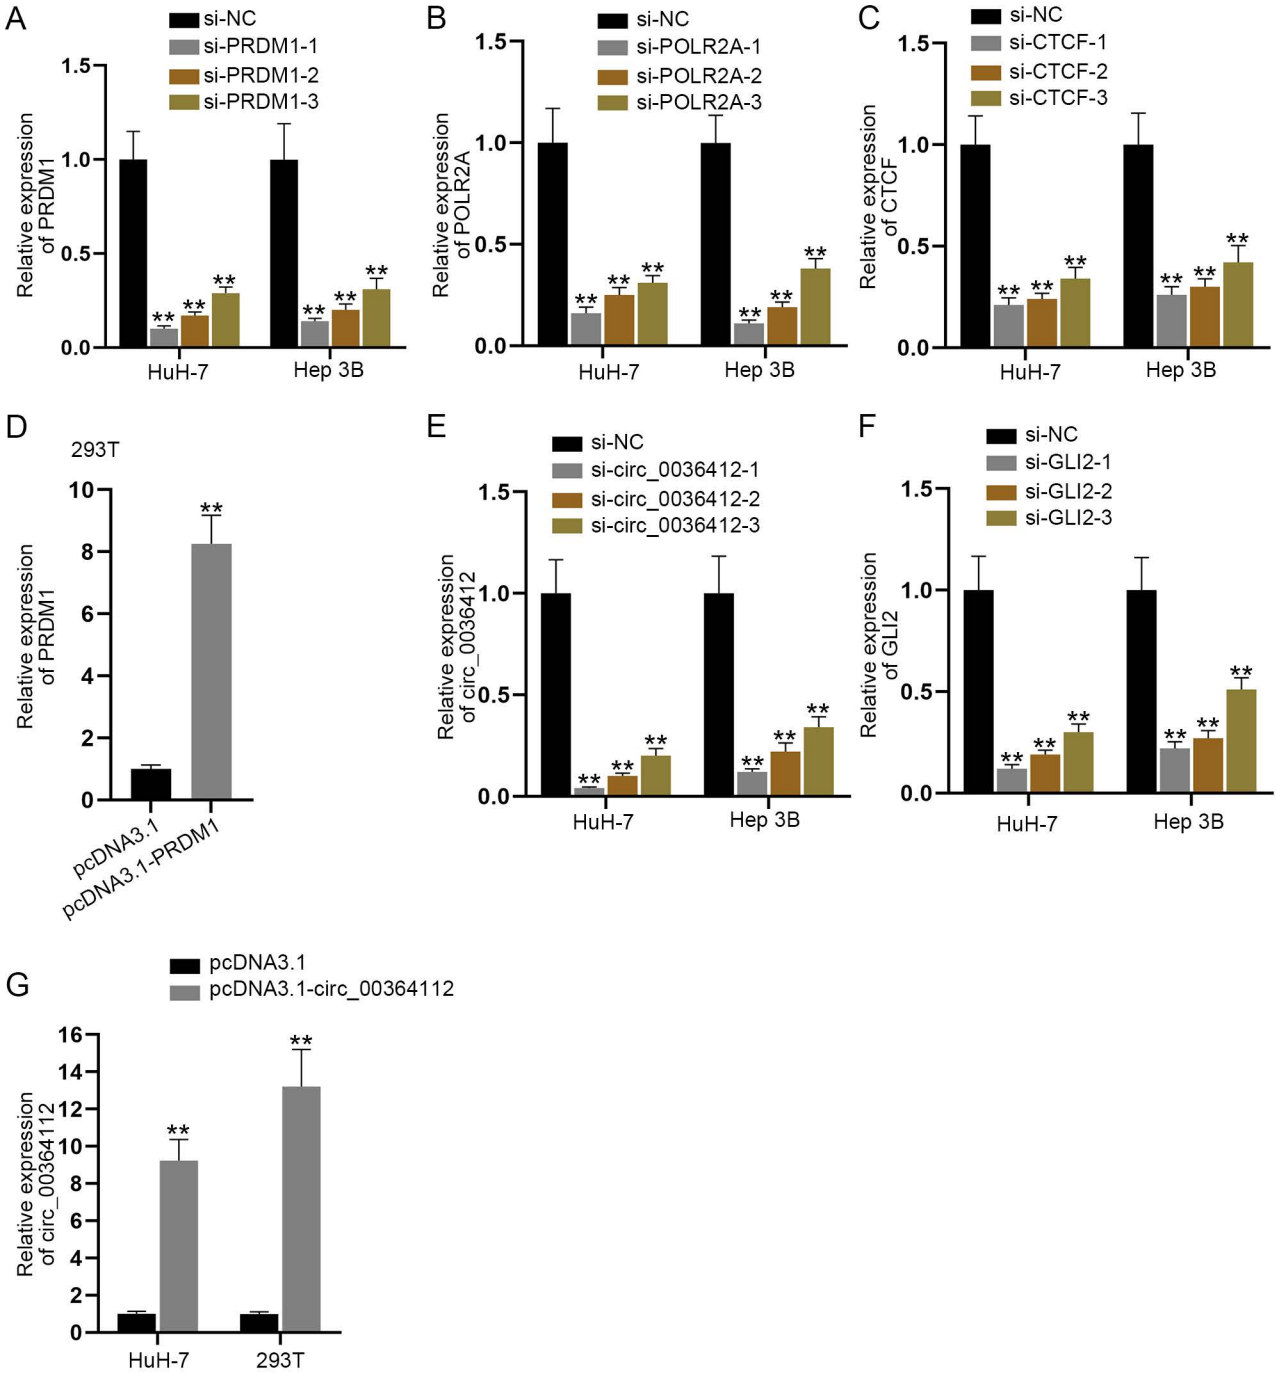

Supplement: MOESM1 [file 20286484]
